# Supplementary material for: CD24: a marker of granulosa cell subpopulation and a mediator of ovulation
Source: PubMed Central journal article supplement (PMC6797718; doi:10.1038/s41419-019-1995-1), 2019-10-17
Supplement: 41419_2019_1995_MOESM4_ESM.pdf [file 41419_2019_1995_MOESM4_ESM.pdf]

## Control 1 (C1)

p\_value is from the negative-binomial test for the detection differential genes over the two cell groups.

avg\_logFC is for the average logarithm values of fold difference.

pct.1 is for the percentage of cells that gives the signal on the designate gene on the target cell group/cluster.

pct.2 is for the percentage of cells that give the signal on the designate gene on the counterpart of the target cell group/cluster.

| gene name  | p_val    | avg_logFC   | pct. 1 | pct. 2 | p_val_adj | Cluster_Ids |
|------------|----------|-------------|--------|--------|-----------|-------------|
| UGP2       | 1.04E-34 | 0.950975685 | 0.908  | 0.568  | 3.50E-30  | CD24+       |
| CPM        | 1.43E-29 | 0.676703619 | 0.95   | 0.668  | 4.80E-25  | CD24+       |
| SAT1       | 1.06E-28 | 0.55152349  | 0.986  | 0.898  | 3.58E-24  | CD24+       |
| MT2A       | 4.34E-27 | 0.745834952 | 0.991  | 0.927  | 1.46E-22  | CD24+       |
| CD24       | 5.24E-24 | 0.825322115 | 0.683  | 0.285  | 1.77E-19  | CD24+       |
| SEC14L2    | 1.87E-22 | 0.448208106 | 0.564  | 0.192  | 6.31E-18  | CD24+       |
| SRGN       | 1.88E-22 | 0.81960172  | 0.564  | 0.212  | 6.32E-18  | CD24+       |
| SMARCA1    | 8.60E-22 | 0.636089377 | 0.968  | 0.791  | 2.89E-17  | CD24+       |
| PTGES      | 1.82E-21 | 0.63049056  | 0.794  | 0.441  | 6.14E-17  | CD24+       |
| HSD11B1    | 2.87E-21 | 0.6440465   | 0.913  | 0.644  | 9.65E-17  | CD24+       |
| RGS2       | 5.30E-20 | 0.576207364 | 0.376  | 0.091  | 1.78E-15  | CD24+       |
| PRKX       | 1.80E-19 | 0.436166988 | 0.995  | 0.793  | 6.06E-15  | CD24+       |
| PEMT       | 1.39E-17 | 0.628694792 | 0.936  | 0.706  | 4.69E-13  | CD24+       |
| SMC6       | 1.78E-17 | 0.707089324 | 0.661  | 0.343  | 5.98E-13  | CD24+       |
| PDLIM1     | 2.94E-17 | 0.457433658 | 0.674  | 0.321  | 9.91E-13  | CD24+       |
| KIF13B     | 3.45E-16 | 0.434545224 | 0.867  | 0.552  | 1.16E-11  | CD24+       |
| GTF3C6     | 1.03E-15 | 0.442966255 | 0.716  | 0.381  | 3.47E-11  | CD24+       |
| ID4        | 3.09E-15 | 0.589318578 | 0.697  | 0.388  | 1.04E-10  | CD24+       |
| DBI        | 3.79E-15 | 0.48977489  | 0.89   | 0.65   | 1.28E-10  | CD24+       |
| SFRP5      | 1.06E-14 | 0.465239049 | 0.44   | 0.169  | 3.58E-10  | CD24+       |
| CRISPLD2   | 2.64E-14 | 0.353809444 | 0.633  | 0.321  | 8.89E-10  | CD24+       |
| FAM83A-AS1 | 3.06E-14 | 0.508796874 | 0.514  | 0.216  | 1.03E-09  | CD24+       |
| ATAD2      | 5.23E-14 | 0.424984475 | 0.532  | 0.234  | 1.76E-09  | CD24+       |
| RAD51C     | 6.08E-14 | 0.383086491 | 0.596  | 0.287  | 2.05E-09  | CD24+       |
| ADAMTS9    | 7.04E-14 | 0.46853662  | 0.372  | 0.125  | 2.37E-09  | CD24+       |
| VMP1       | 1.14E-13 | 0.361655866 | 0.826  | 0.503  | 3.83E-09  | CD24+       |
| SLC6A6     | 1.43E-13 | 0.37868069  | 0.628  | 0.314  | 4.82E-09  | CD24+       |
| SAMHD1     | 1.67E-13 | 0.425696333 | 0.734  | 0.448  | 5.62E-09  | CD24+       |

|           |          |             |       |       |          |       |
|-----------|----------|-------------|-------|-------|----------|-------|
| ALAD      | 1.70E-13 | 0.462895578 | 0.528 | 0.241 | 5.72E-09 | CD24+ |
| RAMP1     | 1.90E-13 | 0.442024318 | 0.413 | 0.149 | 6.38E-09 | CD24+ |
| ASH1L     | 3.21E-13 | 0.28458201  | 0.61  | 0.29  | 1.08E-08 | CD24+ |
| EMP2      | 3.66E-13 | 0.346986607 | 0.573 | 0.274 | 1.23E-08 | CD24+ |
| CST2      | 3.80E-13 | 0.625129926 | 0.427 | 0.171 | 1.28E-08 | CD24+ |
| MYO1B     | 4.07E-13 | 0.411287329 | 0.477 | 0.207 | 1.37E-08 | CD24+ |
| ARHGAP18  | 6.33E-13 | 0.335917664 | 0.463 | 0.189 | 2.13E-08 | CD24+ |
| SSX2IP    | 7.71E-13 | 0.384119652 | 0.317 | 0.098 | 2.59E-08 | CD24+ |
| FKBP11    | 9.20E-13 | 0.412364156 | 0.578 | 0.298 | 3.10E-08 | CD24+ |
| RASD1     | 1.12E-12 | 0.465625408 | 0.427 | 0.176 | 3.77E-08 | CD24+ |
| IGFBP2    | 1.29E-12 | 0.341799719 | 0.729 | 0.428 | 4.33E-08 | CD24+ |
| TECRL     | 1.64E-12 | 0.509336429 | 0.349 | 0.122 | 5.52E-08 | CD24+ |
| PDIA5     | 1.72E-12 | 0.311190963 | 0.408 | 0.158 | 5.80E-08 | CD24+ |
| ZFR       | 1.77E-12 | 0.450737257 | 0.734 | 0.443 | 5.97E-08 | CD24+ |
| MDH1      | 1.81E-12 | 0.398333688 | 0.752 | 0.45  | 6.09E-08 | CD24+ |
| TMEM132C  | 3.11E-12 | 0.297200708 | 0.427 | 0.169 | 1.05E-07 | CD24+ |
| TNFAIP3   | 8.21E-12 | 0.335802232 | 0.454 | 0.2   | 2.76E-07 | CD24+ |
| PHACTR4   | 8.25E-12 | 0.420835136 | 0.78  | 0.494 | 2.78E-07 | CD24+ |
| LAMB1     | 1.02E-11 | 0.360903081 | 0.486 | 0.229 | 3.43E-07 | CD24+ |
| FAM104A   | 1.16E-11 | 0.421067512 | 0.381 | 0.154 | 3.92E-07 | CD24+ |
| IRS2      | 1.24E-11 | 0.365024886 | 0.894 | 0.621 | 4.16E-07 | CD24+ |
| AMOTL1    | 2.44E-11 | 0.315336925 | 0.743 | 0.43  | 8.21E-07 | CD24+ |
| GATA6-AS1 | 2.74E-11 | 0.361439292 | 0.431 | 0.192 | 9.24E-07 | CD24+ |
| GADD45A   | 3.57E-11 | 0.387149034 | 0.849 | 0.572 | 1.20E-06 | CD24+ |
| CBFB      | 6.39E-11 | 0.25185358  | 0.592 | 0.307 | 2.15E-06 | CD24+ |
| TIPARP    | 7.83E-11 | 0.40624464  | 0.312 | 0.111 | 2.64E-06 | CD24+ |
| STRBP     | 1.63E-10 | 0.317458614 | 0.514 | 0.272 | 5.50E-06 | CD24+ |
| SYAP1     | 1.65E-10 | 0.309434311 | 0.693 | 0.396 | 5.56E-06 | CD24+ |
| NR2F2     | 1.75E-10 | 0.301999171 | 0.491 | 0.236 | 5.89E-06 | CD24+ |
| GAL       | 1.81E-10 | 0.857098638 | 0.165 | 0.029 | 6.10E-06 | CD24+ |
| TGFBR3    | 1.98E-10 | 0.42327914  | 0.339 | 0.134 | 6.65E-06 | CD24+ |
| TAF1D     | 2.06E-10 | 0.345155064 | 0.743 | 0.479 | 6.94E-06 | CD24+ |
| GNG5      | 2.09E-10 | 0.355084931 | 0.849 | 0.599 | 7.03E-06 | CD24+ |
| C1R       | 2.97E-10 | 0.313632672 | 0.697 | 0.41  | 9.99E-06 | CD24+ |
| NUDT16    | 3.24E-10 | 0.324113587 | 0.683 | 0.414 | 1.09E-05 | CD24+ |
| SLCO2A1   | 3.40E-10 | 0.306728499 | 0.757 | 0.461 | 1.15E-05 | CD24+ |

|           |          |             |       |       |             |       |
|-----------|----------|-------------|-------|-------|-------------|-------|
| RPS7      | 4.30E-10 | 0.292364843 | 0.913 | 0.666 | 1.45E-05    | CD24+ |
| ABHD12    | 4.80E-10 | 0.289347621 | 0.642 | 0.385 | 1.61E-05    | CD24+ |
| SKIL      | 4.98E-10 | 0.31955233  | 0.39  | 0.171 | 1.68E-05    | CD24+ |
| RBM22     | 5.35E-10 | 0.50944579  | 0.573 | 0.332 | 1.80E-05    | CD24+ |
| TMEM120A  | 6.82E-10 | 0.263137448 | 0.505 | 0.256 | 2.30E-05    | CD24+ |
| CUL4B     | 6.84E-10 | 0.376918199 | 0.569 | 0.316 | 2.30E-05    | CD24+ |
| ELL2      | 8.12E-10 | 0.266128089 | 0.468 | 0.229 | 2.73E-05    | CD24+ |
| APPL2     | 9.26E-10 | 0.311241674 | 0.651 | 0.394 | 3.12E-05    | CD24+ |
| PTGS2     | 9.36E-10 | 0.514430845 | 0.252 | 0.08  | 3.15E-05    | CD24+ |
| WDR60     | 9.93E-10 | 0.374016269 | 0.578 | 0.323 | 3.34E-05    | CD24+ |
| ARHGAP6   | 1.33E-09 | 0.317640272 | 0.803 | 0.521 | 4.48E-05    | CD24+ |
| PLEKHH2   | 1.39E-09 | 0.268513088 | 0.362 | 0.156 | 4.69E-05    | CD24+ |
| ZNF189    | 1.51E-09 | 0.268318393 | 0.358 | 0.151 | 5.08E-05    | CD24+ |
| KIAA1324L | 1.68E-09 | 0.348442523 | 0.275 | 0.098 | 5.64E-05    | CD24+ |
| FST       | 1.76E-09 | 0.430340231 | 0.505 | 0.263 | 5.92E-05    | CD24+ |
| KLF6      | 1.82E-09 | 0.290756858 | 0.972 | 0.84  | 6.12E-05    | CD24+ |
| DNAJC1    | 1.91E-09 | 0.28760082  | 0.592 | 0.323 | 6.42E-05    | CD24+ |
| TOP1      | 2.46E-09 | 0.324706705 | 0.761 | 0.49  | 8.29E-05    | CD24+ |
| ZFP36     | 2.49E-09 | 0.276616239 | 0.573 | 0.323 | 8.38E-05    | CD24+ |
| CLU       | 2.70E-09 | 0.350654503 | 0.931 | 0.748 | 9.09E-05    | CD24+ |
| FAM46A    | 2.72E-09 | 0.31039204  | 0.514 | 0.263 | 9.15E-05    | CD24+ |
| PKP2      | 3.86E-09 | 0.295779758 | 0.358 | 0.158 | 0.000129957 | CD24+ |
| CEP89     | 4.00E-09 | 0.262074208 | 0.45  | 0.22  | 0.000134531 | CD24+ |
| C5orf30   | 4.18E-09 | 0.277721979 | 0.289 | 0.109 | 0.000140734 | CD24+ |
| GPC4      | 4.85E-09 | 0.333871998 | 0.266 | 0.096 | 0.000163357 | CD24+ |
| SPON2     | 5.82E-09 | 0.492416801 | 0.674 | 0.423 | 0.000195776 | CD24+ |
| 7-Sep     | 6.62E-09 | 0.294512653 | 0.817 | 0.568 | 0.000222744 | CD24+ |
| WDR44     | 8.14E-09 | 0.317075316 | 0.307 | 0.129 | 0.000273865 | CD24+ |
| CD63      | 8.84E-09 | 0.279982912 | 0.972 | 0.842 | 0.000297482 | CD24+ |
| GBA2      | 9.87E-09 | 0.258534946 | 0.482 | 0.252 | 0.000332163 | CD24+ |
| ARGLU1    | 1.30E-08 | 0.356649887 | 0.757 | 0.514 | 0.000438631 | CD24+ |
| SRPX2     | 1.89E-08 | 0.264667354 | 0.587 | 0.343 | 0.000636288 | CD24+ |
| KIAA2026  | 2.11E-08 | 0.270855939 | 0.55  | 0.325 | 0.000708979 | CD24+ |
| TMEM37    | 2.29E-08 | 0.362570766 | 0.454 | 0.241 | 0.00077233  | CD24+ |
| FBX025    | 2.52E-08 | 0.256497057 | 0.39  | 0.192 | 0.00084957  | CD24+ |
| ACTN2     | 2.84E-08 | 0.290024395 | 0.431 | 0.232 | 0.000956162 | CD24+ |

|           |          |             |       |       |             |       |
|-----------|----------|-------------|-------|-------|-------------|-------|
| UPF3A     | 3.11E-08 | 0.292165452 | 0.459 | 0.243 | 0.001048344 | CD24+ |
| HSD17B1   | 3.19E-08 | 0.254147537 | 0.362 | 0.169 | 0.001074627 | CD24+ |
| FKBP5     | 3.44E-08 | 0.252774414 | 0.954 | 0.824 | 0.001157325 | CD24+ |
| EIF4ENIF1 | 3.75E-08 | 0.303928491 | 0.294 | 0.122 | 0.00126147  | CD24+ |
| S100B     | 4.01E-08 | 0.28863625  | 0.193 | 0.058 | 0.001350746 | CD24+ |
| CMAS      | 4.35E-08 | 0.304218513 | 0.821 | 0.597 | 0.001464276 | CD24+ |
| ADAMTS1   | 4.76E-08 | 0.359292578 | 0.427 | 0.225 | 0.00160236  | CD24+ |
| HILPDA    | 5.06E-08 | 0.409611299 | 0.335 | 0.151 | 0.00170271  | CD24+ |
| MMD       | 8.77E-08 | 0.361171158 | 0.353 | 0.174 | 0.002952311 | CD24+ |
| RHOU      | 8.89E-08 | 0.317691173 | 0.624 | 0.381 | 0.002991827 | CD24+ |
| NR4A1     | 9.28E-08 | 0.277790205 | 0.716 | 0.479 | 0.00312313  | CD24+ |
| HS3ST1    | 1.98E-07 | 0.386814519 | 0.22  | 0.082 | 0.006677839 | CD24+ |
| EREG      | 2.08E-07 | 0.366087296 | 0.312 | 0.143 | 0.006995504 | CD24+ |
| IDI1      | 2.56E-07 | 0.253088807 | 0.56  | 0.33  | 0.008602057 | CD24+ |
| DUSP6     | 2.87E-07 | 0.268470532 | 0.266 | 0.111 | 0.009673048 | CD24+ |

## Control 2 (C2)

p\_value is from the negative-binomial test for the detection differential genes over the two cell groups.

avg\_logFC is for the average logarithm values of fold difference.

pct.1 is for the percentage of cells that gives the signal on the designate gene on the target cell group/cluster.

pct.2 is for the percentage of cells that give the signal on the designate gene on the counterpart of the target cell group/cluster.

| gene name  | p_val    | avg_logFC   | pct. 1 | pct. 2 | p_val_adj | Cluster_Ids |
|------------|----------|-------------|--------|--------|-----------|-------------|
| UGP2       | 1.04E-34 | 0.950975685 | 0.908  | 0.568  | 3.50E-30  | CD24+       |
| CPM        | 1.43E-29 | 0.676703619 | 0.95   | 0.668  | 4.80E-25  | CD24+       |
| SAT1       | 1.06E-28 | 0.55152349  | 0.986  | 0.898  | 3.58E-24  | CD24+       |
| MT2A       | 4.34E-27 | 0.745834952 | 0.991  | 0.927  | 1.46E-22  | CD24+       |
| CD24       | 5.24E-24 | 0.825322115 | 0.683  | 0.285  | 1.77E-19  | CD24+       |
| SEC14L2    | 1.87E-22 | 0.448208106 | 0.564  | 0.192  | 6.31E-18  | CD24+       |
| SRGN       | 1.88E-22 | 0.81960172  | 0.564  | 0.212  | 6.32E-18  | CD24+       |
| SMARCA1    | 8.60E-22 | 0.636089377 | 0.968  | 0.791  | 2.89E-17  | CD24+       |
| PTGES      | 1.82E-21 | 0.63049056  | 0.794  | 0.441  | 6.14E-17  | CD24+       |
| HSD11B1    | 2.87E-21 | 0.6440465   | 0.913  | 0.644  | 9.65E-17  | CD24+       |
| RGS2       | 5.30E-20 | 0.576207364 | 0.376  | 0.091  | 1.78E-15  | CD24+       |
| PRKX       | 1.80E-19 | 0.436166988 | 0.995  | 0.793  | 6.06E-15  | CD24+       |
| PEMT       | 1.39E-17 | 0.628694792 | 0.936  | 0.706  | 4.69E-13  | CD24+       |
| SMC6       | 1.78E-17 | 0.707089324 | 0.661  | 0.343  | 5.98E-13  | CD24+       |
| PDLIM1     | 2.94E-17 | 0.457433658 | 0.674  | 0.321  | 9.91E-13  | CD24+       |
| KIF13B     | 3.45E-16 | 0.434545224 | 0.867  | 0.552  | 1.16E-11  | CD24+       |
| GTF3C6     | 1.03E-15 | 0.442966255 | 0.716  | 0.381  | 3.47E-11  | CD24+       |
| ID4        | 3.09E-15 | 0.589318578 | 0.697  | 0.388  | 1.04E-10  | CD24+       |
| DBI        | 3.79E-15 | 0.48977489  | 0.89   | 0.65   | 1.28E-10  | CD24+       |
| SFRP5      | 1.06E-14 | 0.465239049 | 0.44   | 0.169  | 3.58E-10  | CD24+       |
| CRISPLD2   | 2.64E-14 | 0.353809444 | 0.633  | 0.321  | 8.89E-10  | CD24+       |
| FAM83A-AS1 | 3.06E-14 | 0.508796874 | 0.514  | 0.216  | 1.03E-09  | CD24+       |
| ATAD2      | 5.23E-14 | 0.424984475 | 0.532  | 0.234  | 1.76E-09  | CD24+       |
| RAD51C     | 6.08E-14 | 0.383086491 | 0.596  | 0.287  | 2.05E-09  | CD24+       |
| ADAMTS9    | 7.04E-14 | 0.46853662  | 0.372  | 0.125  | 2.37E-09  | CD24+       |
| VMP1       | 1.14E-13 | 0.361655866 | 0.826  | 0.503  | 3.83E-09  | CD24+       |
| SLC6A6     | 1.43E-13 | 0.37868069  | 0.628  | 0.314  | 4.82E-09  | CD24+       |
| SAMHD1     | 1.67E-13 | 0.425696333 | 0.734  | 0.448  | 5.62E-09  | CD24+       |

|           |          |             |       |       |          |       |
|-----------|----------|-------------|-------|-------|----------|-------|
| ALAD      | 1.70E-13 | 0.462895578 | 0.528 | 0.241 | 5.72E-09 | CD24+ |
| RAMP1     | 1.90E-13 | 0.442024318 | 0.413 | 0.149 | 6.38E-09 | CD24+ |
| ASH1L     | 3.21E-13 | 0.28458201  | 0.61  | 0.29  | 1.08E-08 | CD24+ |
| EMP2      | 3.66E-13 | 0.346986607 | 0.573 | 0.274 | 1.23E-08 | CD24+ |
| CST2      | 3.80E-13 | 0.625129926 | 0.427 | 0.171 | 1.28E-08 | CD24+ |
| MYO1B     | 4.07E-13 | 0.411287329 | 0.477 | 0.207 | 1.37E-08 | CD24+ |
| ARHGAP18  | 6.33E-13 | 0.335917664 | 0.463 | 0.189 | 2.13E-08 | CD24+ |
| SSX2IP    | 7.71E-13 | 0.384119652 | 0.317 | 0.098 | 2.59E-08 | CD24+ |
| FKBP11    | 9.20E-13 | 0.412364156 | 0.578 | 0.298 | 3.10E-08 | CD24+ |
| RASD1     | 1.12E-12 | 0.465625408 | 0.427 | 0.176 | 3.77E-08 | CD24+ |
| IGFBP2    | 1.29E-12 | 0.341799719 | 0.729 | 0.428 | 4.33E-08 | CD24+ |
| TECRL     | 1.64E-12 | 0.509336429 | 0.349 | 0.122 | 5.52E-08 | CD24+ |
| PDIA5     | 1.72E-12 | 0.311190963 | 0.408 | 0.158 | 5.80E-08 | CD24+ |
| ZFR       | 1.77E-12 | 0.450737257 | 0.734 | 0.443 | 5.97E-08 | CD24+ |
| MDH1      | 1.81E-12 | 0.398333688 | 0.752 | 0.45  | 6.09E-08 | CD24+ |
| TMEM132C  | 3.11E-12 | 0.297200708 | 0.427 | 0.169 | 1.05E-07 | CD24+ |
| TNFAIP3   | 8.21E-12 | 0.335802232 | 0.454 | 0.2   | 2.76E-07 | CD24+ |
| PHACTR4   | 8.25E-12 | 0.420835136 | 0.78  | 0.494 | 2.78E-07 | CD24+ |
| LAMB1     | 1.02E-11 | 0.360903081 | 0.486 | 0.229 | 3.43E-07 | CD24+ |
| FAM104A   | 1.16E-11 | 0.421067512 | 0.381 | 0.154 | 3.92E-07 | CD24+ |
| IRS2      | 1.24E-11 | 0.365024886 | 0.894 | 0.621 | 4.16E-07 | CD24+ |
| AMOTL1    | 2.44E-11 | 0.315336925 | 0.743 | 0.43  | 8.21E-07 | CD24+ |
| GATA6-AS1 | 2.74E-11 | 0.361439292 | 0.431 | 0.192 | 9.24E-07 | CD24+ |
| GADD45A   | 3.57E-11 | 0.387149034 | 0.849 | 0.572 | 1.20E-06 | CD24+ |
| CBFB      | 6.39E-11 | 0.25185358  | 0.592 | 0.307 | 2.15E-06 | CD24+ |
| TIPARP    | 7.83E-11 | 0.40624464  | 0.312 | 0.111 | 2.64E-06 | CD24+ |
| STRBP     | 1.63E-10 | 0.317458614 | 0.514 | 0.272 | 5.50E-06 | CD24+ |
| SYAP1     | 1.65E-10 | 0.309434311 | 0.693 | 0.396 | 5.56E-06 | CD24+ |
| NR2F2     | 1.75E-10 | 0.301999171 | 0.491 | 0.236 | 5.89E-06 | CD24+ |
| GAL       | 1.81E-10 | 0.857098638 | 0.165 | 0.029 | 6.10E-06 | CD24+ |
| TGFBR3    | 1.98E-10 | 0.42327914  | 0.339 | 0.134 | 6.65E-06 | CD24+ |
| TAF1D     | 2.06E-10 | 0.345155064 | 0.743 | 0.479 | 6.94E-06 | CD24+ |
| GNG5      | 2.09E-10 | 0.355084931 | 0.849 | 0.599 | 7.03E-06 | CD24+ |
| C1R       | 2.97E-10 | 0.313632672 | 0.697 | 0.41  | 9.99E-06 | CD24+ |
| NUDT16    | 3.24E-10 | 0.324113587 | 0.683 | 0.414 | 1.09E-05 | CD24+ |
| SLCO2A1   | 3.40E-10 | 0.306728499 | 0.757 | 0.461 | 1.15E-05 | CD24+ |

|           |          |             |       |       |             |       |
|-----------|----------|-------------|-------|-------|-------------|-------|
| RPS7      | 4.30E-10 | 0.292364843 | 0.913 | 0.666 | 1.45E-05    | CD24+ |
| ABHD12    | 4.80E-10 | 0.289347621 | 0.642 | 0.385 | 1.61E-05    | CD24+ |
| SKIL      | 4.98E-10 | 0.31955233  | 0.39  | 0.171 | 1.68E-05    | CD24+ |
| RBM22     | 5.35E-10 | 0.50944579  | 0.573 | 0.332 | 1.80E-05    | CD24+ |
| TMEM120A  | 6.82E-10 | 0.263137448 | 0.505 | 0.256 | 2.30E-05    | CD24+ |
| CUL4B     | 6.84E-10 | 0.376918199 | 0.569 | 0.316 | 2.30E-05    | CD24+ |
| ELL2      | 8.12E-10 | 0.266128089 | 0.468 | 0.229 | 2.73E-05    | CD24+ |
| APPL2     | 9.26E-10 | 0.311241674 | 0.651 | 0.394 | 3.12E-05    | CD24+ |
| PTGS2     | 9.36E-10 | 0.514430845 | 0.252 | 0.08  | 3.15E-05    | CD24+ |
| WDR60     | 9.93E-10 | 0.374016269 | 0.578 | 0.323 | 3.34E-05    | CD24+ |
| ARHGAP6   | 1.33E-09 | 0.317640272 | 0.803 | 0.521 | 4.48E-05    | CD24+ |
| PLEKHH2   | 1.39E-09 | 0.268513088 | 0.362 | 0.156 | 4.69E-05    | CD24+ |
| ZNF189    | 1.51E-09 | 0.268318393 | 0.358 | 0.151 | 5.08E-05    | CD24+ |
| KIAA1324L | 1.68E-09 | 0.348442523 | 0.275 | 0.098 | 5.64E-05    | CD24+ |
| FST       | 1.76E-09 | 0.430340231 | 0.505 | 0.263 | 5.92E-05    | CD24+ |
| KLF6      | 1.82E-09 | 0.290756858 | 0.972 | 0.84  | 6.12E-05    | CD24+ |
| DNAJC1    | 1.91E-09 | 0.28760082  | 0.592 | 0.323 | 6.42E-05    | CD24+ |
| TOP1      | 2.46E-09 | 0.324706705 | 0.761 | 0.49  | 8.29E-05    | CD24+ |
| ZFP36     | 2.49E-09 | 0.276616239 | 0.573 | 0.323 | 8.38E-05    | CD24+ |
| CLU       | 2.70E-09 | 0.350654503 | 0.931 | 0.748 | 9.09E-05    | CD24+ |
| FAM46A    | 2.72E-09 | 0.31039204  | 0.514 | 0.263 | 9.15E-05    | CD24+ |
| PKP2      | 3.86E-09 | 0.295779758 | 0.358 | 0.158 | 0.000129957 | CD24+ |
| CEP89     | 4.00E-09 | 0.262074208 | 0.45  | 0.22  | 0.000134531 | CD24+ |
| C5orf30   | 4.18E-09 | 0.277721979 | 0.289 | 0.109 | 0.000140734 | CD24+ |
| GPC4      | 4.85E-09 | 0.333871998 | 0.266 | 0.096 | 0.000163357 | CD24+ |
| SPON2     | 5.82E-09 | 0.492416801 | 0.674 | 0.423 | 0.000195776 | CD24+ |
| 7-Sep     | 6.62E-09 | 0.294512653 | 0.817 | 0.568 | 0.000222744 | CD24+ |
| WDR44     | 8.14E-09 | 0.317075316 | 0.307 | 0.129 | 0.000273865 | CD24+ |
| CD63      | 8.84E-09 | 0.279982912 | 0.972 | 0.842 | 0.000297482 | CD24+ |
| GBA2      | 9.87E-09 | 0.258534946 | 0.482 | 0.252 | 0.000332163 | CD24+ |
| ARGLU1    | 1.30E-08 | 0.356649887 | 0.757 | 0.514 | 0.000438631 | CD24+ |
| SRPX2     | 1.89E-08 | 0.264667354 | 0.587 | 0.343 | 0.000636288 | CD24+ |
| KIAA2026  | 2.11E-08 | 0.270855939 | 0.55  | 0.325 | 0.000708979 | CD24+ |
| TMEM37    | 2.29E-08 | 0.362570766 | 0.454 | 0.241 | 0.00077233  | CD24+ |
| FBX025    | 2.52E-08 | 0.256497057 | 0.39  | 0.192 | 0.00084957  | CD24+ |
| ACTN2     | 2.84E-08 | 0.290024395 | 0.431 | 0.232 | 0.000956162 | CD24+ |

|           |          |             |       |       |             |       |
|-----------|----------|-------------|-------|-------|-------------|-------|
| UPF3A     | 3.11E-08 | 0.292165452 | 0.459 | 0.243 | 0.001048344 | CD24+ |
| HSD17B1   | 3.19E-08 | 0.254147537 | 0.362 | 0.169 | 0.001074627 | CD24+ |
| FKBP5     | 3.44E-08 | 0.252774414 | 0.954 | 0.824 | 0.001157325 | CD24+ |
| EIF4ENIF1 | 3.75E-08 | 0.303928491 | 0.294 | 0.122 | 0.00126147  | CD24+ |
| S100B     | 4.01E-08 | 0.28863625  | 0.193 | 0.058 | 0.001350746 | CD24+ |
| CMAS      | 4.35E-08 | 0.304218513 | 0.821 | 0.597 | 0.001464276 | CD24+ |
| ADAMTS1   | 4.76E-08 | 0.359292578 | 0.427 | 0.225 | 0.00160236  | CD24+ |
| HILPDA    | 5.06E-08 | 0.409611299 | 0.335 | 0.151 | 0.00170271  | CD24+ |
| MMD       | 8.77E-08 | 0.361171158 | 0.353 | 0.174 | 0.002952311 | CD24+ |
| RHOU      | 8.89E-08 | 0.317691173 | 0.624 | 0.381 | 0.002991827 | CD24+ |
| NR4A1     | 9.28E-08 | 0.277790205 | 0.716 | 0.479 | 0.00312313  | CD24+ |
| HS3ST1    | 1.98E-07 | 0.386814519 | 0.22  | 0.082 | 0.006677839 | CD24+ |
| EREG      | 2.08E-07 | 0.366087296 | 0.312 | 0.143 | 0.006995504 | CD24+ |
| IDI1      | 2.56E-07 | 0.253088807 | 0.56  | 0.33  | 0.008602057 | CD24+ |
| DUSP6     | 2.87E-07 | 0.268470532 | 0.266 | 0.111 | 0.009673048 | CD24+ |
