# Supplementary material for: CD24: a marker of granulosa cell subpopulation and a mediator of ovulation
Source: PubMed Central journal article supplement (PMC6797718; doi:10.1038/s41419-019-1995-1), 2019-10-17
Supplement: 41419_2019_1995_MOESM5_ESM.pdf [file 41419_2019_1995_MOESM5_ESM.pdf]

## Control 1 (C1)

p\_value is from the negative-binomial test for the detection differential genes over the two cell groups.

avg\_logFC is for the average logarithm values of fold difference.

pct.1 is for the percentage of cells that gives the signal on the designate gene on the target cell group/cluster.

pct.2 is for the percentage of cells that give the signal on the designate gene on the counterpart of the target cell group/cluster.

| gene name | p_val       | avg_logFC   | pct. 1 | pct. 2 | p_val_adj   | Cluster_Ids     |
|-----------|-------------|-------------|--------|--------|-------------|-----------------|
| GSTM3     | 4.79583E-27 | 0.519375389 | 1      | 1      | 1.61591E-22 | Double negative |
| DIRAS3    | 5.69068E-27 | 0.90488752  | 0.975  | 0.912  | 1.91742E-22 | Double negative |
| STAR      | 3.49795E-26 | 0.712993039 | 0.993  | 0.971  | 1.1786E-21  | Double negative |
| NREP      | 6.11354E-26 | 0.526371377 | 0.975  | 0.96   | 2.0599E-21  | Double negative |
| FDX1      | 3.00041E-25 | 0.737531069 | 0.993  | 0.974  | 1.01096E-20 | Double negative |
| SEMA3A    | 6.31933E-23 | 0.421728374 | 0.998  | 0.942  | 2.12923E-18 | Double negative |
| MRO       | 1.06682E-21 | 0.624002329 | 0.965  | 0.931  | 3.59456E-17 | Double negative |
| HSD3B2    | 3.60161E-20 | 0.865778975 | 0.96   | 0.887  | 1.21352E-15 | Double negative |
| AQP11     | 2.12188E-18 | 0.401383396 | 0.754  | 0.511  | 7.14945E-14 | Double negative |
| LSAMP     | 2.25019E-17 | 0.330093584 | 0.789  | 0.54   | 7.58179E-13 | Double negative |
| CYCS      | 4.94577E-17 | 0.333044424 | 0.975  | 0.964  | 1.66643E-12 | Double negative |
| NR5A2     | 1.01516E-16 | 0.311147262 | 0.918  | 0.792  | 3.42048E-12 | Double negative |
| RDX       | 2.82259E-16 | 0.38521062  | 1      | 0.993  | 9.51045E-12 | Double negative |
| S100A16   | 8.83284E-16 | 0.276228931 | 0.995  | 0.996  | 2.97614E-11 | Double negative |
| ATP2B4    | 2.04029E-15 | 0.366063647 | 0.958  | 0.901  | 6.87454E-11 | Double negative |
| TCEAL3    | 2.05262E-15 | 0.30265261  | 0.97   | 0.934  | 6.9161E-11  | Double negative |
| KLHL4     | 2.68595E-15 | 0.261548218 | 0.96   | 0.883  | 9.05004E-11 | Double negative |
| SPARC     | 2.19052E-14 | 0.383712364 | 1      | 1      | 7.38073E-10 | Double negative |
| AREG      | 3.16721E-14 | 0.692950534 | 0.983  | 0.949  | 1.06716E-09 | Double negative |
| TM4SF1    | 1.31179E-13 | 0.423109846 | 0.98   | 0.92   | 4.41996E-09 | Double negative |
| SMIM14    | 6.67776E-13 | 0.276147883 | 0.958  | 0.898  | 2.25E-08    | Double negative |
| GPC6      | 7.8821E-13  | 0.277466466 | 0.938  | 0.843  | 2.6558E-08  | Double negative |
| IFITM3    | 1.50859E-12 | 0.262006954 | 0.995  | 1      | 5.08303E-08 | Double negative |
| ADAMTS9   | 3.04909E-12 | 0.322148788 | 0.659  | 0.453  | 1.02736E-07 | Double negative |
| MT3       | 3.13764E-12 | 0.479496842 | 0.647  | 0.431  | 1.0572E-07  | Double negative |
| BEX1      | 4.12769E-12 | 0.407429844 | 0.983  | 0.967  | 1.39079E-07 | Double negative |
| C12orf75  | 5.1986E-12  | 0.297881558 | 0.878  | 0.774  | 1.75161E-07 | Double negative |
| C7        | 5.87541E-12 | 0.408188284 | 0.833  | 0.679  | 1.97966E-07 | Double negative |

|          |             |             |       |       |             |                 |
|----------|-------------|-------------|-------|-------|-------------|-----------------|
| GOS2     | 6.88852E-12 | 0.523568467 | 0.965 | 0.985 | 2.32102E-07 | Double negative |
| PAPPA    | 1.1577E-11  | 0.43846829  | 0.771 | 0.573 | 3.90075E-07 | Double negative |
| HMGCS1   | 1.45398E-11 | 0.373105898 | 0.945 | 0.894 | 4.89904E-07 | Double negative |
| ANXA5    | 5.4601E-11  | 0.257016488 | 1     | 0.996 | 1.83973E-06 | Double negative |
| S100A6   | 5.4748E-11  | 0.282517908 | 1     | 1     | 1.84468E-06 | Double negative |
| HSPB1    | 1.87945E-10 | 0.314889059 | 1     | 0.996 | 6.33263E-06 | Double negative |
| LGALS1   | 2.65091E-10 | 0.312329033 | 1     | 0.993 | 8.93199E-06 | Double negative |
| SRPX     | 3.61533E-10 | 0.391744065 | 1     | 1     | 1.21815E-05 | Double negative |
| PGK1     | 6.90859E-10 | 0.254598076 | 0.983 | 0.956 | 2.32778E-05 | Double negative |
| AADAC    | 8.90605E-10 | 0.267945074 | 0.764 | 0.562 | 3.00081E-05 | Double negative |
| MGST1    | 3.47861E-09 | 0.319049147 | 0.985 | 0.942 | 0.000117208 | Double negative |
| PPP1R14A | 3.38827E-08 | 0.326054513 | 0.619 | 0.489 | 0.001141644 | Double negative |
| ATP1A1   | 4.69011E-08 | 0.277436521 | 0.995 | 0.993 | 0.001580287 | Double negative |

## Control 2 (C2)

p\_value is from the negative-binomial test for the detection differential genes over the two cell groups.

avg\_logFC is for the average logarithm values of fold difference.

pct.1 is for the percentage of cells that gives the signal on the designate gene on the target cell group/cluster.

pct.2 is for the percentage of cells that give the signal on the designate gene on the counterpart of the target cell group/cluster.

| gene name | p_val | avg_logFC | pct. 1 | pct. 2 | p_val_adj | Cluster_Ids |
|-----------|-------|-----------|--------|--------|-----------|-------------|
|-----------|-------|-----------|--------|--------|-----------|-------------|
