# Supplementary material for: CD24: a marker of granulosa cell subpopulation and a mediator of ovulation
Source: PubMed Central journal article supplement (PMC6797718; doi:10.1038/s41419-019-1995-1), 2019-10-17
Supplement: 41419_2019_1995_MOESM6_ESM.pdf [file 41419_2019_1995_MOESM6_ESM.pdf]

## Control 1 (C1)

p\_value is from the negative-binomial test for the detection differential genes over the two cell groups.

avg\_logFC is for the average logarithm values of fold difference.

pct.1 is for the percentage of cells that gives the signal on the designate gene on the target cell group/cluster.

pct.2 is for the percentage of cells that give the signal on the designate gene on the counterpart of the target cell group/cluster.

| gene name | p_val    | avg_logFC   | pct. 1 | pct. 2 | p_val_adj | Cluster_Ids |
|-----------|----------|-------------|--------|--------|-----------|-------------|
| SFRP4     | 3.27E-49 | 1.831389554 | 0.807  | 0.237  | 1.10E-44  | IGFBP5+     |
| PALLD     | 1.05E-43 | 1.221991742 | 0.982  | 0.73   | 3.53E-39  | IGFBP5+     |
| IGFBP5    | 4.90E-42 | 1.971660515 | 1      | 0.84   | 1.65E-37  | IGFBP5+     |
| THBS1     | 1.74E-38 | 1.302219094 | 1      | 0.92   | 5.86E-34  | IGFBP5+     |
| COL1A2    | 2.01E-38 | 1.216540723 | 0.904  | 0.445  | 6.76E-34  | IGFBP5+     |
| SMS       | 1.06E-37 | 0.775964887 | 1      | 0.961  | 3.58E-33  | IGFBP5+     |
| GJA1      | 1.07E-36 | 0.931776838 | 1      | 0.973  | 3.61E-32  | IGFBP5+     |
| IGFBP7    | 6.97E-31 | 0.757985466 | 1      | 0.996  | 2.35E-26  | IGFBP5+     |
| RDH10     | 1.08E-30 | 0.71440814  | 0.605  | 0.158  | 3.65E-26  | IGFBP5+     |
| GDNF      | 3.86E-30 | 0.32376516  | 0.439  | 0.06   | 1.30E-25  | IGFBP5+     |
| STMN1     | 5.40E-29 | 0.850294697 | 0.965  | 0.938  | 1.82E-24  | IGFBP5+     |
| CTNNAL1   | 2.51E-28 | 0.754175978 | 0.982  | 0.941  | 8.46E-24  | IGFBP5+     |
| ACSM3     | 4.13E-28 | 0.854967645 | 0.965  | 0.639  | 1.39E-23  | IGFBP5+     |
| KLHDC8A   | 4.44E-28 | 0.475171119 | 0.675  | 0.23   | 1.50E-23  | IGFBP5+     |
| CRIM1     | 1.00E-27 | 0.45747562  | 0.763  | 0.302  | 3.38E-23  | IGFBP5+     |
| FILIP1L   | 1.72E-27 | 0.824436511 | 0.842  | 0.489  | 5.79E-23  | IGFBP5+     |
| HTRA1     | 2.48E-26 | 0.931860941 | 0.982  | 0.954  | 8.35E-22  | IGFBP5+     |
| DAAM1     | 6.74E-26 | 0.698003611 | 0.947  | 0.788  | 2.27E-21  | IGFBP5+     |
| MARCKSL1  | 8.34E-26 | 0.64196881  | 0.991  | 0.929  | 2.81E-21  | IGFBP5+     |
| HMCN1     | 1.33E-25 | 0.498353078 | 0.658  | 0.226  | 4.48E-21  | IGFBP5+     |
| ANTXR1    | 2.88E-25 | 0.435117577 | 0.842  | 0.427  | 9.69E-21  | IGFBP5+     |
| F3        | 4.84E-25 | 1.269047777 | 0.842  | 0.552  | 1.63E-20  | IGFBP5+     |
| CCDC80    | 6.02E-25 | 0.347727153 | 0.491  | 0.11   | 2.03E-20  | IGFBP5+     |
| PTMA      | 6.43E-25 | 0.730231734 | 1      | 0.996  | 2.17E-20  | IGFBP5+     |
| FHL2      | 1.30E-24 | 0.710190616 | 0.982  | 0.957  | 4.36E-20  | IGFBP5+     |
| CYR61     | 3.78E-24 | 1.51116733  | 0.956  | 0.907  | 1.27E-19  | IGFBP5+     |
| SOX4      | 3.52E-23 | 1.268119356 | 0.711  | 0.361  | 1.19E-18  | IGFBP5+     |
| PHACTR2   | 3.57E-23 | 0.478006037 | 0.825  | 0.468  | 1.20E-18  | IGFBP5+     |

|                 |           |              |        |        |           |         |
|-----------------|-----------|--------------|--------|--------|-----------|---------|
| ARL4C           | 4. 64E-23 | 0. 491936601 | 0. 596 | 0. 196 | 1. 56E-18 | IGFBP5+ |
| RP11-277P12. 20 | 5. 24E-23 | 0. 62307141  | 0. 746 | 0. 338 | 1. 77E-18 | IGFBP5+ |
| P3H2            | 5. 39E-23 | 0. 590440158 | 1      | 0. 922 | 1. 82E-18 | IGFBP5+ |
| COL3A1          | 6. 70E-23 | 0. 557362108 | 0. 746 | 0. 311 | 2. 26E-18 | IGFBP5+ |
| EBPL            | 6. 77E-23 | 0. 319824449 | 0. 675 | 0. 265 | 2. 28E-18 | IGFBP5+ |
| B4GALT5         | 1. 90E-22 | 0. 588690787 | 0. 956 | 0. 831 | 6. 41E-18 | IGFBP5+ |
| VIM             | 2. 97E-22 | 0. 630968028 | 1      | 1      | 1. 00E-17 | IGFBP5+ |
| SPATS2          | 3. 04E-22 | 0. 489856164 | 0. 939 | 0. 799 | 1. 03E-17 | IGFBP5+ |
| EXT1            | 3. 11E-22 | 0. 598364279 | 0. 982 | 0. 776 | 1. 05E-17 | IGFBP5+ |
| RNASE1          | 3. 66E-22 | 0. 642335901 | 0. 825 | 0. 496 | 1. 23E-17 | IGFBP5+ |
| JUP             | 3. 92E-22 | 0. 315923842 | 0. 684 | 0. 279 | 1. 32E-17 | IGFBP5+ |
| CLEC4M          | 1. 68E-21 | 0. 294906962 | 0. 404 | 0. 084 | 5. 65E-17 | IGFBP5+ |
| EPHX1           | 1. 86E-21 | 0. 549897331 | 0. 912 | 0. 705 | 6. 28E-17 | IGFBP5+ |
| NEXN            | 2. 02E-21 | 0. 417996408 | 0. 64  | 0. 265 | 6. 80E-17 | IGFBP5+ |
| NTN4            | 1. 01E-20 | 0. 385890105 | 0. 605 | 0. 221 | 3. 42E-16 | IGFBP5+ |
| NAP1L1          | 1. 29E-20 | 0. 360423786 | 0. 991 | 0. 973 | 4. 36E-16 | IGFBP5+ |
| IRS1            | 2. 01E-20 | 0. 512378217 | 0. 746 | 0. 397 | 6. 76E-16 | IGFBP5+ |
| MDK             | 2. 30E-20 | 0. 653414155 | 0. 991 | 0. 991 | 7. 75E-16 | IGFBP5+ |
| NRP2            | 5. 76E-20 | 0. 363935125 | 0. 474 | 0. 13  | 1. 94E-15 | IGFBP5+ |
| CITED2          | 9. 74E-20 | 0. 695546675 | 0. 991 | 0. 952 | 3. 28E-15 | IGFBP5+ |
| PPP1R12B        | 2. 08E-19 | 0. 533237312 | 0. 886 | 0. 568 | 7. 01E-15 | IGFBP5+ |
| MYH11           | 2. 26E-19 | 0. 422380547 | 0. 474 | 0. 139 | 7. 61E-15 | IGFBP5+ |
| SLC20A2         | 2. 57E-19 | 0. 407891427 | 0. 702 | 0. 356 | 8. 65E-15 | IGFBP5+ |
| ABLIM1          | 4. 78E-19 | 0. 319830076 | 0. 667 | 0. 301 | 1. 61E-14 | IGFBP5+ |
| RBP1            | 5. 64E-19 | 0. 44221434  | 1      | 1      | 1. 90E-14 | IGFBP5+ |
| MYH9            | 5. 88E-19 | 0. 483908342 | 0. 982 | 0. 934 | 1. 98E-14 | IGFBP5+ |
| H3F3A           | 1. 02E-18 | 0. 392084309 | 0. 982 | 0. 996 | 3. 44E-14 | IGFBP5+ |
| DDB1            | 1. 11E-18 | 0. 469023914 | 0. 93  | 0. 776 | 3. 73E-14 | IGFBP5+ |
| SERPINH1        | 1. 16E-18 | 0. 471768796 | 1      | 0. 92  | 3. 90E-14 | IGFBP5+ |
| MYC             | 1. 31E-18 | 0. 836290383 | 0. 842 | 0. 649 | 4. 41E-14 | IGFBP5+ |
| MARCKS          | 1. 70E-18 | 0. 452564156 | 0. 947 | 0. 867 | 5. 72E-14 | IGFBP5+ |
| YPEL1           | 3. 63E-18 | 0. 259095501 | 0. 544 | 0. 19  | 1. 22E-13 | IGFBP5+ |
| SMAD3           | 6. 29E-18 | 0. 42055017  | 0. 851 | 0. 598 | 2. 12E-13 | IGFBP5+ |
| RAB31           | 7. 43E-18 | 0. 434309275 | 0. 939 | 0. 802 | 2. 50E-13 | IGFBP5+ |
| TCEA3           | 8. 58E-18 | 0. 302673462 | 0. 544 | 0. 201 | 2. 89E-13 | IGFBP5+ |
| WISP2           | 9. 76E-18 | 0. 649412508 | 0. 737 | 0. 422 | 3. 29E-13 | IGFBP5+ |

|               |           |              |        |        |           |         |
|---------------|-----------|--------------|--------|--------|-----------|---------|
| SEPP1         | 1. 03E-17 | 1. 05202486  | 0. 904 | 0. 819 | 3. 48E-13 | IGFBP5+ |
| JADE1         | 1. 34E-17 | 0. 768123276 | 0. 921 | 0. 799 | 4. 53E-13 | IGFBP5+ |
| SFRP1         | 1. 64E-17 | 0. 554409747 | 0. 456 | 0. 146 | 5. 53E-13 | IGFBP5+ |
| HDAC2         | 1. 98E-17 | 0. 47782492  | 0. 912 | 0. 84  | 6. 68E-13 | IGFBP5+ |
| SPARCL1       | 2. 67E-17 | 0. 43070056  | 0. 474 | 0. 151 | 9. 01E-13 | IGFBP5+ |
| SLC4A7        | 2. 80E-17 | 0. 367068295 | 0. 649 | 0. 319 | 9. 44E-13 | IGFBP5+ |
| RPSA          | 3. 33E-17 | 0. 298921396 | 1      | 0. 993 | 1. 12E-12 | IGFBP5+ |
| RP4-621F18. 2 | 3. 33E-17 | 0. 312510524 | 0. 404 | 0. 103 | 1. 12E-12 | IGFBP5+ |
| SEMA7A        | 6. 57E-17 | 0. 27565187  | 0. 719 | 0. 347 | 2. 21E-12 | IGFBP5+ |
| ARID5B        | 7. 95E-17 | 0. 677390464 | 0. 921 | 0. 842 | 2. 68E-12 | IGFBP5+ |
| HEG1          | 8. 70E-17 | 0. 477341423 | 0. 711 | 0. 42  | 2. 93E-12 | IGFBP5+ |
| MRPL15        | 4. 82E-16 | 0. 347955721 | 0. 851 | 0. 674 | 1. 62E-11 | IGFBP5+ |
| SIGLEC11      | 5. 32E-16 | 0. 334286836 | 0. 632 | 0. 288 | 1. 79E-11 | IGFBP5+ |
| GSTA1         | 6. 71E-16 | 0. 601415412 | 0. 974 | 0. 87  | 2. 26E-11 | IGFBP5+ |
| NDRG2         | 9. 42E-16 | 0. 384124087 | 0. 825 | 0. 544 | 3. 17E-11 | IGFBP5+ |
| ARL6IP5       | 1. 10E-15 | 0. 666435368 | 0. 965 | 0. 957 | 3. 70E-11 | IGFBP5+ |
| YBX3          | 1. 26E-15 | 0. 480908987 | 0. 965 | 0. 966 | 4. 25E-11 | IGFBP5+ |
| SLC40A1       | 1. 31E-15 | 0. 527101972 | 0. 509 | 0. 205 | 4. 42E-11 | IGFBP5+ |
| ABCA8         | 2. 09E-15 | 0. 61640469  | 0. 772 | 0. 464 | 7. 03E-11 | IGFBP5+ |
| UGCG          | 2. 12E-15 | 0. 542638671 | 0. 667 | 0. 374 | 7. 15E-11 | IGFBP5+ |
| TXN           | 2. 55E-15 | 0. 400302983 | 0. 939 | 0. 943 | 8. 60E-11 | IGFBP5+ |
| CEBPD         | 3. 13E-15 | 0. 610900238 | 0. 833 | 0. 665 | 1. 05E-10 | IGFBP5+ |
| ADAMTS6       | 3. 18E-15 | 0. 393468179 | 0. 421 | 0. 13  | 1. 07E-10 | IGFBP5+ |
| AMIGO2        | 3. 21E-15 | 0. 532630804 | 0. 667 | 0. 379 | 1. 08E-10 | IGFBP5+ |
| EIF4A1        | 4. 20E-15 | 0. 35410304  | 0. 974 | 0. 984 | 1. 42E-10 | IGFBP5+ |
| SERINC5       | 4. 62E-15 | 0. 288327985 | 0. 596 | 0. 269 | 1. 56E-10 | IGFBP5+ |
| SLITRK4       | 6. 82E-15 | 0. 321431217 | 0. 421 | 0. 13  | 2. 30E-10 | IGFBP5+ |
| DBN1          | 8. 35E-15 | 0. 35896814  | 0. 868 | 0. 649 | 2. 81E-10 | IGFBP5+ |
| GBP2          | 9. 50E-15 | 0. 351406873 | 0. 632 | 0. 315 | 3. 20E-10 | IGFBP5+ |
| LIMS1         | 1. 21E-14 | 0. 449961733 | 0. 912 | 0. 861 | 4. 08E-10 | IGFBP5+ |
| APEX1         | 1. 45E-14 | 0. 332210744 | 0. 912 | 0. 849 | 4. 89E-10 | IGFBP5+ |
| UCHL1         | 2. 34E-14 | 0. 433162878 | 0. 842 | 0. 674 | 7. 90E-10 | IGFBP5+ |
| RBMX          | 2. 46E-14 | 0. 371434032 | 0. 93  | 0. 931 | 8. 28E-10 | IGFBP5+ |
| METAP2        | 3. 08E-14 | 0. 266742569 | 0. 965 | 0. 907 | 1. 04E-09 | IGFBP5+ |
| FAM60A        | 4. 95E-14 | 0. 338480276 | 0. 781 | 0. 55  | 1. 67E-09 | IGFBP5+ |
| NOP56         | 5. 46E-14 | 0. 343801944 | 0. 868 | 0. 678 | 1. 84E-09 | IGFBP5+ |

|          |          |             |       |       |          |         |
|----------|----------|-------------|-------|-------|----------|---------|
| NPC2     | 6.38E-14 | 0.418076515 | 0.965 | 0.957 | 2.15E-09 | IGFBP5+ |
| CADM4    | 7.14E-14 | 0.276627642 | 0.728 | 0.413 | 2.41E-09 | IGFBP5+ |
| CCDC74A  | 8.70E-14 | 0.403932941 | 0.693 | 0.427 | 2.93E-09 | IGFBP5+ |
| GPX3     | 1.06E-13 | 0.506836406 | 0.588 | 0.286 | 3.58E-09 | IGFBP5+ |
| FN1      | 1.60E-13 | 0.751478574 | 1     | 1     | 5.40E-09 | IGFBP5+ |
| TXNRD1   | 1.77E-13 | 0.461749446 | 0.982 | 0.945 | 5.97E-09 | IGFBP5+ |
| TMEM245  | 1.86E-13 | 0.385944832 | 0.895 | 0.715 | 6.27E-09 | IGFBP5+ |
| CSDC2    | 1.94E-13 | 0.307822632 | 0.912 | 0.747 | 6.55E-09 | IGFBP5+ |
| KRT8     | 2.49E-13 | 0.676270541 | 0.772 | 0.614 | 8.39E-09 | IGFBP5+ |
| FRMD4B   | 3.06E-13 | 0.283808679 | 0.658 | 0.359 | 1.03E-08 | IGFBP5+ |
| PEG10    | 3.18E-13 | 0.392223705 | 0.649 | 0.345 | 1.07E-08 | IGFBP5+ |
| IQCG     | 4.83E-13 | 0.35453257  | 0.868 | 0.753 | 1.63E-08 | IGFBP5+ |
| LXN      | 5.27E-13 | 0.444804556 | 0.781 | 0.571 | 1.78E-08 | IGFBP5+ |
| OLA1     | 5.78E-13 | 0.289248274 | 0.877 | 0.785 | 1.95E-08 | IGFBP5+ |
| NPM1     | 7.27E-13 | 0.320843399 | 0.982 | 0.988 | 2.45E-08 | IGFBP5+ |
| NFE2L2   | 8.37E-13 | 0.327355928 | 0.956 | 0.895 | 2.82E-08 | IGFBP5+ |
| TMEM98   | 9.98E-13 | 0.30555599  | 0.868 | 0.74  | 3.36E-08 | IGFBP5+ |
| RPAIN    | 1.04E-12 | 0.327062408 | 0.851 | 0.799 | 3.51E-08 | IGFBP5+ |
| NDFIP1   | 1.17E-12 | 0.532451899 | 0.974 | 0.986 | 3.95E-08 | IGFBP5+ |
| S100A13  | 1.47E-12 | 0.444488893 | 0.965 | 0.963 | 4.96E-08 | IGFBP5+ |
| FSCN1    | 1.63E-12 | 0.464168092 | 0.904 | 0.77  | 5.49E-08 | IGFBP5+ |
| NBL1     | 1.85E-12 | 0.439467001 | 0.798 | 0.6   | 6.25E-08 | IGFBP5+ |
| WLS      | 1.87E-12 | 0.623889342 | 0.614 | 0.359 | 6.31E-08 | IGFBP5+ |
| LAPTM4B  | 2.10E-12 | 0.339545572 | 0.877 | 0.806 | 7.07E-08 | IGFBP5+ |
| DDAH1    | 2.77E-12 | 0.290406533 | 0.667 | 0.39  | 9.34E-08 | IGFBP5+ |
| MRAS     | 3.27E-12 | 0.291888921 | 0.623 | 0.359 | 1.10E-07 | IGFBP5+ |
| PCBP2    | 3.46E-12 | 0.264376524 | 0.974 | 0.988 | 1.17E-07 | IGFBP5+ |
| SNAPC1   | 3.51E-12 | 0.467114435 | 0.675 | 0.418 | 1.18E-07 | IGFBP5+ |
| RHOBTB3  | 3.73E-12 | 0.630515213 | 1     | 0.98  | 1.26E-07 | IGFBP5+ |
| CALD1    | 3.81E-12 | 0.541846592 | 0.921 | 0.877 | 1.28E-07 | IGFBP5+ |
| KRT18    | 4.05E-12 | 0.819627948 | 0.649 | 0.416 | 1.36E-07 | IGFBP5+ |
| GNL3     | 4.71E-12 | 0.286298965 | 0.825 | 0.594 | 1.59E-07 | IGFBP5+ |
| VCL      | 6.74E-12 | 0.418191858 | 1     | 0.97  | 2.27E-07 | IGFBP5+ |
| ADGRL2   | 8.19E-12 | 0.292643315 | 0.675 | 0.39  | 2.76E-07 | IGFBP5+ |
| C1orf141 | 1.04E-11 | 0.361257848 | 0.754 | 0.482 | 3.49E-07 | IGFBP5+ |
| LCMT1    | 1.24E-11 | 0.334299332 | 0.974 | 0.959 | 4.19E-07 | IGFBP5+ |

|              |          |             |       |       |          |         |
|--------------|----------|-------------|-------|-------|----------|---------|
| RP11-347P5.1 | 1.28E-11 | 0.499401409 | 0.526 | 0.247 | 4.32E-07 | IGFBP5+ |
| SEC14L1      | 1.58E-11 | 0.281143181 | 0.912 | 0.815 | 5.33E-07 | IGFBP5+ |
| DDX5         | 1.68E-11 | 0.255492663 | 1     | 0.996 | 5.64E-07 | IGFBP5+ |
| OXTR         | 1.80E-11 | 0.348051464 | 0.763 | 0.445 | 6.07E-07 | IGFBP5+ |
| GPX4         | 2.33E-11 | 0.310573046 | 0.956 | 0.98  | 7.85E-07 | IGFBP5+ |
| HN1          | 2.46E-11 | 0.426256994 | 0.921 | 0.897 | 8.28E-07 | IGFBP5+ |
| ENC1         | 2.49E-11 | 0.255360412 | 0.298 | 0.084 | 8.39E-07 | IGFBP5+ |
| ERRFI1       | 2.51E-11 | 0.5428947   | 0.912 | 0.843 | 8.47E-07 | IGFBP5+ |
| MFGES8       | 2.57E-11 | 0.292972663 | 0.868 | 0.685 | 8.68E-07 | IGFBP5+ |
| TKT          | 3.02E-11 | 0.300570158 | 0.912 | 0.881 | 1.02E-06 | IGFBP5+ |
| HUWE1        | 3.53E-11 | 0.41632007  | 0.868 | 0.708 | 1.19E-06 | IGFBP5+ |
| TAGLN        | 4.07E-11 | 0.608597111 | 0.553 | 0.299 | 1.37E-06 | IGFBP5+ |
| SMARCC1      | 5.37E-11 | 0.293103106 | 0.711 | 0.539 | 1.81E-06 | IGFBP5+ |
| NEAT1        | 5.67E-11 | 0.480719643 | 0.991 | 0.998 | 1.91E-06 | IGFBP5+ |
| KHDRBS1      | 6.34E-11 | 0.31696543  | 0.93  | 0.907 | 2.13E-06 | IGFBP5+ |
| RRAD         | 6.39E-11 | 0.918140328 | 0.64  | 0.415 | 2.15E-06 | IGFBP5+ |
| SYNE2        | 6.56E-11 | 0.332869735 | 0.719 | 0.468 | 2.21E-06 | IGFBP5+ |
| C19orf48     | 7.61E-11 | 0.368670379 | 0.772 | 0.633 | 2.56E-06 | IGFBP5+ |
| PFDN4        | 1.03E-10 | 0.295892469 | 0.851 | 0.845 | 3.47E-06 | IGFBP5+ |
| CDH2         | 1.14E-10 | 0.317884611 | 0.974 | 0.945 | 3.83E-06 | IGFBP5+ |
| SERPINE2     | 1.24E-10 | 0.869339743 | 1     | 0.984 | 4.16E-06 | IGFBP5+ |
| GTF2I        | 1.39E-10 | 0.292749503 | 0.895 | 0.819 | 4.69E-06 | IGFBP5+ |
| ATP1B3       | 1.58E-10 | 0.3156266   | 0.947 | 0.849 | 5.34E-06 | IGFBP5+ |
| HNRNPA0      | 1.59E-10 | 0.305649491 | 0.956 | 0.954 | 5.35E-06 | IGFBP5+ |
| ATRX         | 1.59E-10 | 0.356858291 | 0.947 | 0.899 | 5.36E-06 | IGFBP5+ |
| ILF2         | 1.86E-10 | 0.266185904 | 0.93  | 0.883 | 6.26E-06 | IGFBP5+ |
| PIM1         | 1.86E-10 | 0.268317801 | 0.561 | 0.304 | 6.27E-06 | IGFBP5+ |
| PUM3         | 1.88E-10 | 0.259409803 | 0.675 | 0.42  | 6.35E-06 | IGFBP5+ |
| TRIM28       | 2.29E-10 | 0.262541586 | 0.86  | 0.637 | 7.73E-06 | IGFBP5+ |
| CDK5RAP2     | 2.50E-10 | 0.752648237 | 0.711 | 0.53  | 8.42E-06 | IGFBP5+ |
| TBC1D23      | 3.25E-10 | 0.367851709 | 0.833 | 0.714 | 1.09E-05 | IGFBP5+ |
| GSN          | 3.51E-10 | 0.260492078 | 0.842 | 0.71  | 1.18E-05 | IGFBP5+ |
| MYL9         | 4.58E-10 | 0.402627549 | 0.965 | 0.954 | 1.54E-05 | IGFBP5+ |
| CTSC         | 5.20E-10 | 0.298307279 | 0.632 | 0.359 | 1.75E-05 | IGFBP5+ |
| CTGF         | 7.22E-10 | 0.572797971 | 0.605 | 0.352 | 2.43E-05 | IGFBP5+ |
| GREM1        | 8.54E-10 | 0.704182558 | 0.377 | 0.164 | 2.88E-05 | IGFBP5+ |

|          |          |             |       |       |             |         |
|----------|----------|-------------|-------|-------|-------------|---------|
| TMSB4X   | 9.99E-10 | 0.324623496 | 1     | 1     | 3.37E-05    | IGFBP5+ |
| MAP2K3   | 1.02E-09 | 0.256615501 | 0.746 | 0.537 | 3.43E-05    | IGFBP5+ |
| ZFAS1    | 1.52E-09 | 0.292312515 | 0.895 | 0.913 | 5.13E-05    | IGFBP5+ |
| PAWR     | 1.75E-09 | 0.254070681 | 0.754 | 0.546 | 5.90E-05    | IGFBP5+ |
| PRSS23   | 1.97E-09 | 0.452689441 | 0.982 | 0.934 | 6.65E-05    | IGFBP5+ |
| MAGED2   | 2.22E-09 | 0.365856994 | 0.991 | 0.977 | 7.49E-05    | IGFBP5+ |
| GNPTAB   | 2.24E-09 | 0.292341797 | 0.833 | 0.68  | 7.56E-05    | IGFBP5+ |
| NAV2     | 2.28E-09 | 0.275049193 | 0.605 | 0.34  | 7.67E-05    | IGFBP5+ |
| COL1A1   | 2.77E-09 | 0.613840028 | 0.579 | 0.356 | 9.34E-05    | IGFBP5+ |
| OCIAD2   | 2.88E-09 | 0.264106449 | 0.816 | 0.73  | 9.70E-05    | IGFBP5+ |
| CFI      | 2.95E-09 | 0.284537389 | 0.86  | 0.717 | 9.96E-05    | IGFBP5+ |
| KTN1     | 3.30E-09 | 0.2882101   | 1     | 0.977 | 0.000111276 | IGFBP5+ |
| ZNF106   | 3.70E-09 | 0.260678078 | 0.86  | 0.71  | 0.000124816 | IGFBP5+ |
| AKAP9    | 3.94E-09 | 0.280742959 | 0.956 | 0.943 | 0.00013287  | IGFBP5+ |
| SYTL4    | 4.27E-09 | 0.34463899  | 0.658 | 0.436 | 0.000143761 | IGFBP5+ |
| EIF5B    | 4.91E-09 | 0.252391874 | 0.93  | 0.902 | 0.000165593 | IGFBP5+ |
| BGN      | 6.05E-09 | 0.296717074 | 0.579 | 0.317 | 0.000203849 | IGFBP5+ |
| IGF1R    | 6.45E-09 | 0.320058804 | 0.93  | 0.84  | 0.000217252 | IGFBP5+ |
| SLC38A2  | 1.43E-08 | 0.342202417 | 0.965 | 0.923 | 0.000483223 | IGFBP5+ |
| HMGA2    | 1.51E-08 | 0.315454719 | 0.509 | 0.306 | 0.000507416 | IGFBP5+ |
| HMGN5    | 2.20E-08 | 0.428005486 | 0.649 | 0.411 | 0.000742794 | IGFBP5+ |
| HMGB1    | 2.72E-08 | 0.343057595 | 0.982 | 0.973 | 0.000915859 | IGFBP5+ |
| IER3     | 3.17E-08 | 0.405671686 | 0.956 | 0.954 | 0.001067861 | IGFBP5+ |
| PBX1     | 3.18E-08 | 0.255972682 | 0.658 | 0.445 | 0.001071878 | IGFBP5+ |
| TIMP3    | 3.26E-08 | 0.813418536 | 0.632 | 0.438 | 0.001099893 | IGFBP5+ |
| GRB14    | 3.60E-08 | 0.389640834 | 0.754 | 0.593 | 0.001213354 | IGFBP5+ |
| NCL      | 3.84E-08 | 0.252606652 | 0.956 | 0.94  | 0.001295075 | IGFBP5+ |
| TBC1D4   | 4.14E-08 | 0.271921042 | 0.596 | 0.377 | 0.001396045 | IGFBP5+ |
| ZNF281   | 4.52E-08 | 0.278655187 | 0.711 | 0.543 | 0.00152351  | IGFBP5+ |
| EPS8     | 5.26E-08 | 0.320421138 | 0.912 | 0.875 | 0.001770844 | IGFBP5+ |
| DSP      | 6.17E-08 | 0.304756919 | 0.781 | 0.598 | 0.002080457 | IGFBP5+ |
| GSTA4    | 6.47E-08 | 0.317170228 | 0.947 | 0.893 | 0.002181226 | IGFBP5+ |
| TMEM200A | 7.19E-08 | 0.309932611 | 0.789 | 0.628 | 0.002423401 | IGFBP5+ |
| AXL      | 8.18E-08 | 0.296515085 | 0.982 | 0.922 | 0.002757465 | IGFBP5+ |
| PEG3     | 9.52E-08 | 0.326736909 | 0.728 | 0.489 | 0.003208429 | IGFBP5+ |
| ENAH     | 1.02E-07 | 0.35148365  | 0.974 | 0.957 | 0.003421114 | IGFBP5+ |

|          |           |              |        |        |              |         |
|----------|-----------|--------------|--------|--------|--------------|---------|
| IGFBP1   | 1. 07E-07 | 0. 72989594  | 0. 325 | 0. 137 | 0. 003603141 | IGFBP5+ |
| CTSA     | 1. 11E-07 | 0. 278614734 | 0. 912 | 0. 792 | 0. 003739616 | IGFBP5+ |
| TSPAN6   | 1. 33E-07 | 0. 303214986 | 0. 781 | 0. 617 | 0. 004483472 | IGFBP5+ |
| LACTB    | 1. 33E-07 | 0. 260111215 | 0. 816 | 0. 701 | 0. 004493341 | IGFBP5+ |
| JARID2   | 1. 55E-07 | 0. 270472682 | 0. 658 | 0. 445 | 0. 005233026 | IGFBP5+ |
| STAMBPL1 | 1. 69E-07 | 0. 38578397  | 0. 553 | 0. 365 | 0. 005709664 | IGFBP5+ |
| MLLT11   | 2. 00E-07 | 0. 324031047 | 0. 5   | 0. 302 | 0. 006748567 | IGFBP5+ |
| SRGAP1   | 2. 01E-07 | 0. 273157492 | 0. 789 | 0. 642 | 0. 006776784 | IGFBP5+ |
| PRKCA    | 2. 25E-07 | 0. 327757316 | 0. 956 | 0. 897 | 0. 007574925 | IGFBP5+ |
| SNHG8    | 2. 80E-07 | 0. 269489631 | 0. 816 | 0. 731 | 0. 009449018 | IGFBP5+ |

## Control 2 (C2)

p\_value is from the negative-binomial test for the detection differential genes over the two cell groups.

avg\_logFC is for the average logarithm values of fold difference.

pct.1 is for the percentage of cells that gives the signal on the designate gene on the target cell group/cluster.

pct.2 is for the percentage of cells that give the signal on the designate gene on the counterpart of the target cell group/cluster.

p\_val\_adj is the p value after benferroni correction of multi-tests study.

| gene name | p_val    | avg_logFC   | pct. 1 | pct. 2 | p_val_adj | Cluster Ids |
|-----------|----------|-------------|--------|--------|-----------|-------------|
| GJA1      | 6.75E-26 | 0.472451649 | 0.996  | 0.9    | 2.27E-21  | IGFBP5+     |
| RDX       | 3.12E-23 | 0.47189783  | 0.996  | 0.935  | 1.05E-18  | IGFBP5+     |
| BEX1      | 5.42E-22 | 0.55025875  | 0.968  | 0.787  | 1.83E-17  | IGFBP5+     |
| SPARC     | 8.23E-21 | 0.349897272 | 1      | 0.976  | 2.77E-16  | IGFBP5+     |
| TMEM123   | 1.01E-16 | 0.409454828 | 0.855  | 0.522  | 3.39E-12  | IGFBP5+     |
| GSTA1     | 7.07E-16 | 0.652265673 | 0.783  | 0.505  | 2.38E-11  | IGFBP5+     |
| GSTA4     | 1.18E-13 | 0.363068644 | 0.707  | 0.411  | 3.97E-09  | IGFBP5+     |
| NUPR1     | 1.36E-13 | 0.473175666 | 0.759  | 0.455  | 4.59E-09  | IGFBP5+     |
| RAB31     | 2.88E-13 | 0.412832282 | 0.755  | 0.471  | 9.69E-09  | IGFBP5+     |
| RNASE1    | 3.96E-13 | 0.273329685 | 0.345  | 0.112  | 1.33E-08  | IGFBP5+     |
| ULBP1     | 4.23E-13 | 0.441201622 | 0.719  | 0.445  | 1.42E-08  | IGFBP5+     |
| IGFBP5    | 5.00E-13 | 0.614377784 | 0.96   | 0.792  | 1.68E-08  | IGFBP5+     |
| CXXC5     | 6.65E-13 | 0.341292016 | 0.602  | 0.325  | 2.24E-08  | IGFBP5+     |
| CALB2     | 1.96E-12 | 0.376850257 | 0.667  | 0.378  | 6.60E-08  | IGFBP5+     |
| LRAT      | 2.12E-12 | 0.265366669 | 0.767  | 0.476  | 7.12E-08  | IGFBP5+     |
| GBP2      | 4.46E-12 | 0.420376722 | 0.422  | 0.184  | 1.50E-07  | IGFBP5+     |
| DAAM1     | 6.49E-12 | 0.276348223 | 0.687  | 0.411  | 2.18E-07  | IGFBP5+     |
| SIGLEC11  | 7.71E-12 | 0.26357335  | 0.454  | 0.201  | 2.60E-07  | IGFBP5+     |
| LMO4      | 1.85E-11 | 0.370658359 | 0.506  | 0.258  | 6.24E-07  | IGFBP5+     |
| CDH11     | 3.01E-11 | 0.389202561 | 0.566  | 0.309  | 1.01E-06  | IGFBP5+     |
| FSCN1     | 3.54E-11 | 0.312730448 | 0.735  | 0.49   | 1.19E-06  | IGFBP5+     |
| STK17B    | 3.79E-11 | 0.396147512 | 0.494  | 0.251  | 1.27E-06  | IGFBP5+     |
| LRRFIP2   | 7.07E-11 | 0.331400046 | 0.799  | 0.533  | 2.38E-06  | IGFBP5+     |
| TNNI3     | 7.88E-11 | 0.384547542 | 0.414  | 0.184  | 2.65E-06  | IGFBP5+     |
| ITGA1     | 8.98E-11 | 0.33890407  | 0.333  | 0.124  | 3.02E-06  | IGFBP5+     |
| S100A16   | 1.21E-10 | 0.270188853 | 0.831  | 0.584  | 4.08E-06  | IGFBP5+     |
| TIMP3     | 1.26E-10 | 0.330574909 | 0.723  | 0.457  | 4.23E-06  | IGFBP5+     |
| FAM198B   | 1.79E-10 | 0.334060915 | 0.594  | 0.337  | 6.01E-06  | IGFBP5+     |



|          |          |             |       |       |             |         |
|----------|----------|-------------|-------|-------|-------------|---------|
| MEF2C    | 2.43E-10 | 0.278846705 | 0.574 | 0.323 | 8.19E-06    | IGFBP5+ |
| HMGB1    | 3.06E-10 | 0.33694414  | 0.815 | 0.586 | 1.03E-05    | IGFBP5+ |
| SMS      | 5.59E-10 | 0.261400107 | 0.618 | 0.371 | 1.88E-05    | IGFBP5+ |
| TNC      | 1.11E-09 | 0.367162666 | 0.936 | 0.782 | 3.74E-05    | IGFBP5+ |
| RPS27L   | 1.57E-09 | 0.329326953 | 0.827 | 0.603 | 5.28E-05    | IGFBP5+ |
| THBS1    | 1.62E-09 | 0.444933067 | 0.839 | 0.596 | 5.47E-05    | IGFBP5+ |
| S100A13  | 2.02E-09 | 0.364911523 | 0.723 | 0.517 | 6.79E-05    | IGFBP5+ |
| PPP1R12B | 2.82E-09 | 0.274156443 | 0.534 | 0.297 | 9.48E-05    | IGFBP5+ |
| SOX4     | 3.17E-09 | 0.656525915 | 0.494 | 0.292 | 0.00010674  | IGFBP5+ |
| PRKCA    | 5.78E-09 | 0.277906671 | 0.703 | 0.467 | 0.000194685 | IGFBP5+ |
| MRAS     | 6.73E-09 | 0.287109293 | 0.285 | 0.115 | 0.00022654  | IGFBP5+ |
| BOD1     | 6.83E-09 | 0.300129425 | 0.369 | 0.177 | 0.00022998  | IGFBP5+ |
| CBLB     | 7.57E-09 | 0.255632467 | 0.622 | 0.373 | 0.000254832 | IGFBP5+ |
| GPRC5B   | 8.84E-09 | 0.330422069 | 0.293 | 0.122 | 0.000297509 | IGFBP5+ |
| TOMM7    | 1.24E-08 | 0.274680179 | 0.691 | 0.45  | 0.000418157 | IGFBP5+ |
| FBXL20   | 1.28E-08 | 0.266900973 | 0.574 | 0.34  | 0.000431513 | IGFBP5+ |
| CTNNA1   | 1.37E-08 | 0.256781657 | 0.835 | 0.629 | 0.000460672 | IGFBP5+ |
| PEG3     | 1.37E-08 | 0.259933452 | 0.691 | 0.459 | 0.000462665 | IGFBP5+ |
| OXTR     | 1.51E-08 | 0.313950744 | 0.51  | 0.289 | 0.000509836 | IGFBP5+ |
| EPS8     | 3.63E-08 | 0.290492582 | 0.518 | 0.311 | 0.001222839 | IGFBP5+ |
| FABP3    | 4.09E-08 | 0.343553608 | 0.618 | 0.414 | 0.001376986 | IGFBP5+ |
| GNAI1    | 5.21E-08 | 0.311421189 | 0.426 | 0.23  | 0.001754462 | IGFBP5+ |
| GMNN     | 5.36E-08 | 0.461877666 | 0.249 | 0.098 | 0.001803231 | IGFBP5+ |
| TJP1     | 7.99E-08 | 0.271504594 | 0.382 | 0.194 | 0.002689868 | IGFBP5+ |
| WFDC3    | 8.11E-08 | 0.300350744 | 0.289 | 0.122 | 0.002729653 | IGFBP5+ |
| PNCK     | 9.98E-08 | 0.271473413 | 0.659 | 0.447 | 0.003360632 | IGFBP5+ |
| PSD3     | 1.15E-07 | 0.29500892  | 0.606 | 0.392 | 0.003879878 | IGFBP5+ |
| NDRG2    | 1.18E-07 | 0.261741213 | 0.43  | 0.242 | 0.003984253 | IGFBP5+ |
| OTOF     | 1.36E-07 | 0.320416449 | 0.269 | 0.117 | 0.004577452 | IGFBP5+ |
| NDFIP1   | 2.28E-07 | 0.372610825 | 0.687 | 0.517 | 0.007678562 | IGFBP5+ |
| BEX2     | 2.54E-07 | 0.250317928 | 0.534 | 0.325 | 0.008561216 | IGFBP5+ |
| MAP1LC3A | 2.80E-07 | 0.284696159 | 0.635 | 0.423 | 0.009441373 | IGFBP5+ |
